1           **Comparative analysis of RNA enrichment methods for preparation of**  
2                           ***Cryptococcus neoformans* RNA sequencing libraries**

3  
4   **Calla L. Telzrow,<sup>\*,†</sup> Paul J. Zwack,<sup>‡</sup> Shannon Esher Righi,<sup>§</sup> Fred S. Dietrich,<sup>†</sup>**  
5   **Cliburn Chan,<sup>\*\*</sup> Kouros Owzar,<sup>\*\*</sup> †† J. Andrew Alspaugh,<sup>\*,†</sup> Joshua A. Granek<sup>\*\*</sup>, ††,<sup>1</sup>**

6   <sup>\*</sup>Department of Medicine, Duke University School of Medicine, Durham, NC 27710,

7   <sup>†</sup>Department of Molecular Genetics and Microbiology, Duke University School of  
8   Medicine, Durham, NC 27710,

9   <sup>‡</sup>Department of Biology, Duke University, Durham, NC 27710,

10   <sup>§</sup>Department of Microbiology and Immunology, Tulane University School of Medicine,  
11   New Orleans, LA 70112,

12   <sup>\*\*</sup>Department of Biostatistics and Bioinformatics, Duke University Medical Center,  
13   Durham, NC 27710,

14   <sup>††</sup>Duke Cancer Institute, Duke University, Durham, NC 27710

15

16   **GitHub repositories:**

17   [https://github.com/granek/rna\\_enrichment](https://github.com/granek/rna_enrichment)

18   <https://github.com/granek/LncPipe>

19

20   **GEO repository:**

21   GSE160397

22

23

24 **Running title:**

25 *Cryptococcus neoformans* RNA enrichment methods

26

27 **Keywords:**

28 RNA sequencing, RNA enrichment, ribosomal RNA, non-coding RNA

29

30 **<sup>1</sup> Corresponding author:**

31 Joshua A. Granek

32 2424 Erwin Rd., 11099 Hock Plaza, Durham, NC 27710

33 Box 2721

34 (919) 684-0333

35 [joshua.granek@duke.edu](mailto:joshua.granek@duke.edu)

36

37

38

39

40

41

42

43

44

45

46

47

## ABSTRACT

48 Ribosomal RNA (rRNA) is the major RNA constituent of cells, therefore most  
49 RNA sequencing (RNA-Seq) experiments involve removal of rRNA. This process, called  
50 RNA enrichment, is done primarily to reduce cost: without rRNA removal, deeper  
51 sequencing would need to be performed to balance the sequencing reads wasted on  
52 rRNA. The ideal RNA enrichment method would remove all rRNA without affecting other  
53 RNA in the sample. We have tested the performance of three RNA enrichment methods  
54 on RNA isolated from *Cryptococcus neoformans*, a fungal pathogen of humans. We  
55 show that the RNase H depletion method unambiguously outperforms the commonly  
56 used Poly(A) isolation method: the RNase H method more efficiently depletes rRNA  
57 while more accurately recapitulating the expression levels of other RNA observed in an  
58 unenriched “gold standard”. The RNase H depletion method is also superior to the Ribo-  
59 Zero depletion method as measured by rRNA depletion efficiency and recapitulation of  
60 protein-coding gene expression levels, while the Ribo-Zero depletion method performs  
61 moderately better in preserving non-coding RNA (ncRNA). Finally, we have leveraged  
62 this dataset to identify novel long non-coding RNA (lncRNA) genes and to accurately  
63 map the *C. neoformans* mitochondrial rRNA genes.

64  
65  
66  
67  
68  
69  
70  
71  
72  
73  
74  
75  
76  
77  
78  
79  
80  
81  
82  
83  
84  
85  
86

## ARTICLE SUMMARY

We compare the efficacy of three different RNA enrichment methods for RNA-Seq in *Cryptococcus neoformans*: RNase H depletion, Ribo-Zero depletion, and Poly(A) isolation. We show that the RNase H depletion method, which is evaluated in *C. neoformans* samples for the first time here, is highly efficient and specific in removing rRNA. Additionally, using data generated through these analyses, we identify novel long non-coding RNA genes in *C. neoformans*. We conclude that RNase H depletion is an effective and reliable method for preparation of *C. neoformans* RNA-Seq libraries.

87

## INTRODUCTION

88

89

90

91

92

93

94

95

96

97

98

99

RNA sequencing (RNA-Seq) is a powerful tool for quantifying gene expression in diverse organisms. Despite the rapid and continual decrease in sequencing costs, the expense of sequencing is often the limiting factor in designing RNA-Seq experiments. Due to this cost constraint, enrichment of the RNA classes of interest, hereafter referred to as “RNA enrichment”, is an important step in library preparation for most RNA-Seq experiments. Ribosomal RNA (rRNA) is the most abundant RNA in any cell, generally constituting more than 90% of the total RNA (Giannoukos *et al.* 2012). Despite its abundance, it is rarely of interest in RNA-Seq experiments, therefore, 90% or more of the data is useless when generated without an RNA enrichment step. RNA enrichment aims to reduce the content of RNA in the library, eliminating sequencing capacity wasted on uninformative data and reducing the cost of data storage and analysis, thus decreasing the overall cost of the experiment.

100

101

102

103

104

105

106

107

108

109

There are many different methods for RNA enrichment and many products available based on these different methods. When selecting an RNA enrichment method and product there are two key considerations: 1) the fraction of rRNA removed; 2) the side effects on other RNAs in the sample. RNA enrichment methods either specifically target the RNA of interest, most commonly mRNA, for isolation or specifically target rRNA for removal (Zhao *et al.* 2014). The most common mRNA isolation method, poly(A) isolation, uses an oligo(dT) affinity matrix. Raw RNA is hybridized to the matrix, which preferentially binds the 3' polyadenylation sequence of mRNA. By enriching polyadenylated mRNA, rRNA, which lacks 3' polyadenylation, is depleted de facto. Although mRNA isolation methods are typically efficient in eliminating

110 rRNA, they fail to capture any RNA molecules lacking polyadenylation, such as non-  
111 coding RNA (ncRNA). They are also only applicable to eukaryotes, since mRNA in  
112 prokaryotes is generally not polyadenylated. Most rRNA removal methods involve  
113 hybridization of sequence-specific probes to rRNA. These probes target the rRNA for  
114 depletion. In the Ribo-Zero depletion method, the probes are synthesized with a  
115 molecular tag, which is used to bind the probe-rRNA complex to beads, allowing the  
116 complexed rRNA to be removed from solution (Zhao *et al.* 2014). In the ribonuclease H  
117 (RNase H) depletion method, sequence-specific DNA probes hybridized to rRNA target  
118 the rRNA for enzymatic degradation by RNase H, which specifically degrades RNA from  
119 RNA-DNA complexes (Morlan *et al.* 2012). The duplex-specific nuclease (DSN) method  
120 indiscriminately depletes high abundance sequences by denaturing and reannealing the  
121 prepared RNA-Seq library, then treating with a duplex-specific nuclease to degrade all  
122 double-stranded DNA. Under the conditions used for reannealing, high abundance  
123 sequences are much more likely to find a complementary sequence, so high abundance  
124 sequences, including but not limited to rRNA, are preferentially removed from the pool  
125 (Yi *et al.* 2011).

126 The poly(A) isolation and DSN methods are attractive because they are broadly  
127 applicable without any organism-specific adaptation: the poly(A) method works in all  
128 eukaryotes and the DSN method should work in any organism. However, the rRNA  
129 removal methods (Ribo-Zero and RNase H) are more targeted, and are therefore  
130 expected to have fewer side-effects on biologically-important RNA molecules, such as  
131 protein-coding RNA and ncRNA. The downside inherent in the targeted nature of the  
132 rRNA depletion methods is that the sequence-specific probes must be designed for the

133 organism under experimentation or a close relative for maximal efficacy. Because rRNA  
134 is the most highly conserved sequence across the tree of life (Isenbarger *et al.* 2008),  
135 probes designed for an evolutionarily distant species will often work, but efficiency of  
136 rRNA depletion decreases with evolutionary distance. For all rRNA depletion methods,  
137 the performance of these rRNA removal methods can vary by organism, so it is  
138 important to assess them on the organism of interest.

139         The budding yeast *Cryptococcus neoformans* is a human fungal pathogen that  
140 infects more than 200,000 people annually and causes excessive mortality among  
141 immunocompromised patient populations, such as those with HIV/AIDS and those  
142 receiving immunosuppressive cancer therapies (Rajasingham *et al.* 2017). Research on  
143 *C. neoformans* helps us better understand this pathogen, contributes to the  
144 development of treatments for *C. neoformans* infections, and advances our  
145 understanding of fungal pathogens in general. RNA-Seq has been used extensively in  
146 *C. neoformans* studies to elucidate regulatory networks of protein-coding genes (Chang  
147 *et al.* 2014; Chen *et al.* 2014; Janbon *et al.* 2014; Gish *et al.* 2016; Chow *et al.* 2017;  
148 Brown *et al.* 2018, 2020; Yu *et al.* 2020). While there is intense interest in the role of  
149 ncRNA in higher eukaryotes such as humans, relatively little work has explored the  
150 implications of ncRNA in fungi, with focus largely on model fungi such as  
151 *Saccharomyces cerevisiae* (Bird *et al.* 2006; Bumgarner *et al.* 2009, 2011; Gelfand *et al.*  
152 2011; Parker *et al.* 2018) and *Schizosaccharomyces pombe* (Ding *et al.* 2012; Atkinson  
153 *et al.* 2018). However, multiple recent studies have demonstrated the importance of  
154 ncRNA in *Cryptococcus* biology and virulence, including microRNA (miRNA) (Jiang *et*  
155 *al.* 2012; Liu *et al.* 2020), small interfering RNA (siRNA) (Wang *et al.* 2010; Janbon *et al.*

156 2010; Liu *et al.* 2020), and long non-coding RNA (lncRNA) (Fan *et al.* 2005; Chacko *et*  
157 *al.* 2015; Liu *et al.* 2020).

158 In planning and analyzing RNA-Seq experiments in *C. neoformans*, it is essential  
159 to understand the side-effect profile of the RNA enrichment method used. RNA  
160 enrichment methods that alter levels of RNA of interest may give misleading or incorrect  
161 results; this is a special concern for analysis of ncRNA. Here, we assess three different  
162 enrichment methods for RNA-Seq applications in *C. neoformans*: RNase H depletion,  
163 Ribo-Zero depletion, and Poly(A) isolation. The Ribo-Zero depletion (“Ribo-Zero Kit  
164 Species Compatibility Tables”; Trevijano-Contador *et al.* 2018; Liu *et al.* 2020) and  
165 Poly(A) isolation (Bloom *et al.* 2019; Brown *et al.* 2020) methods have been used  
166 previously in *C. neoformans*, while the RNase H method has not. However, none of  
167 these methods have been evaluated in *C. neoformans* in comparison to each other,  
168 much less to an unenriched “gold standard.” By performing this controlled experiment,  
169 we have been able to quantify the efficiency of rRNA depletion and determined the side-  
170 effects of each depletion method on non-rRNA genes.

171 We find that the RNase H depletion method is more efficient than the Ribo-Zero  
172 depletion and the Poly(A) isolation methods in removing rRNA. Additionally, we report  
173 that the RNase H depletion method is highly specific; it performs better than the other  
174 two methods in preserving protein-coding RNA, and nearly as well as the Ribo-Zero  
175 depletion method in preserving ncRNA. Because the RNase H depletion and Ribo-Zero  
176 depletion methods both preserve ncRNA, we utilized the data generated from these  
177 methods to identify novel *C. neoformans* lncRNA. Collectively, this work demonstrates  
178 that RNase H depletion is an effective RNA enrichment method for use in preparation of



179 *C. neoformans* RNA-Seq libraries, further emphasizes the role of RNA enrichment in  
180 design of economical RNA-Seq experiments, and highlights the importance of knowing  
181 the side-effect profile when choosing an RNA enrichment method.

182

183

## MATERIALS AND METHODS

### 184 **Strains, media, and growth conditions:**

185 The *C. neoformans* var. *grubii* H99 (*MAT $\alpha$* ) wild-type strain was used for all  
186 experiments. This strain was maintained on yeast extract-peptone-dextrose (YPD)  
187 medium (1% yeast extract, 2% peptone, 2% dextrose, and 2% agar for solid medium).

188

### 189 **RNA-Seq library preparation:**

190 Three biological replicate samples (A, B, and C) were used for all analyses.  
191 Samples were prepared by growing H99 to mid-logarithmic growth phase in three  
192 separate flasks of liquid YPD medium, with 150 rpm shaking. Approximately  
193  $1 \times 10^9$  cells from each sample were pelleted, resuspended in fresh YPD medium, and  
194 incubated at 30°C for 90 min with 150 rpm shaking. Cells were then pelleted, flash  
195 frozen on dry ice, and lyophilized for ~18 hours. Total RNA was isolated using the  
196 Qiagen RNeasy Plant Mini Kit (Qiagen, Valencia, CA); on-column DNase digestion was  
197 performed to ensure elimination of contaminating genomic DNA. Total RNA quantity  
198 and quality were assessed using the Agilent 2100 Bioanalyzer. Purified total RNA was  
199 subsequently stored at -80°C.

200

201 Aliquots from each total RNA sample were treated with one of three different  
RNA enrichment methods: the RNase H method for selective depletion of rRNA (Morlan

202 *et al.* 2012; Adiconis *et al.* 2013), the Ribo-Zero rRNA Removal Kit (Yeast) (Illumina,  
203 San Diego, CA), and the NEBNext® Poly(A) mRNA Magnetic Isolation Module (NEB  
204 #E7490) (New England Biolabs, Ipswich, MA). RNA-Seq libraries were prepared from  
205 these enriched samples and from unenriched control “gold standard” samples (i.e.  
206 “Unenriched”) using the NEBNext® Ultra™ II Directional RNA Library Prep with Sample  
207 Purification Beads (NEB #E7765) and NEBNext® Multiplex Oligos for Illumina® (Dual  
208 Index Primers Set 1) (NEB #E7600) (New England Biolabs, Ipswich, MA). Libraries  
209 were pooled and sequenced by the Duke Sequencing and Genomic Technologies  
210 Shared Resource on an Illumina NextSeq 500 using the High-Output Kit to produce 75-  
211 basepair single-end reads.

212         It should be noted that while all work was done with the same three total RNA  
213 samples, the enrichment, library preparation, and sequencing were done in two  
214 batches, approximately one year apart. In between, total RNA samples were stored at -  
215 80°C. Ribo-Zero-treated, Poly(A)-treated, and Unenriched RNA control libraries were  
216 prepared and sequenced in the first batch. RNase H-treated, replicate Poly(A)-treated,  
217 and replicate Unenriched RNA control libraries were prepared and sequenced in the  
218 second batch. All Unenriched RNA samples were compared and shown to be highly  
219 correlated (Figures 2A, 3A, & 4A), demonstrating that batch effect and differences in  
220 total RNA storage times did not confound comparisons. It should also be noted that the  
221 Ribo-Zero-treated libraries, the Poly(A)-treated libraries, and the Unenriched libraries  
222 were prepared by multiple individuals, which may explain some of the sample variation  
223 within those groups, while the RNase H-treated libraries were all prepared by a single

224 individual. The individual who prepared each library is noted in the library metadata  
225 deposited at GEO.

226

227 **RNase H depletion:**

228       The RNase H depletion method (Morlan *et al.* 2012; Adiconis *et al.* 2013) is  
229 described briefly here; a more detailed protocol is included in supplementary data (File  
230 S1). The hybridization reaction mixture consisted of 1 µg of total RNA, 1 µl of 5x  
231 Hybridization Buffer (1000 mM NaCl, 500 mM Tris-HCl, pH 7.5), 0.65 µl of 100 µM  
232 pooled targeting oligos (discussed below), and nuclease-free water to bring the reaction  
233 to 5 µl. Oligo hybridization was performed in a thermocycler with the following program:  
234 2 minutes at 95°C, ramp from 95°C to 22°C at -0.1°C/s, 5 minutes at 22°C. After  
235 hybridization, samples were transferred to ice and RNase H (New England Biolabs,  
236 Ipswich, MA) was added: 2 µl RNase H (5 U/µl), 1 µl 10x RNase H Reaction Buffer, 2 µl  
237 nuclease-free water. RNase H digestion was performed at 37°C for 30 minutes. After  
238 RNase H digestion, samples were stored on ice while adding DNase I (New England  
239 Biolabs, Ipswich, MA): 4 µl DNase I (2 U/µl), 10 µl 10x DNase I Reaction Buffer, 76 µl  
240 nuclease-free water. DNase I digestion was performed at 37°C for 30 minutes. After  
241 DNase I digestion, samples were transferred to ice. rRNA depleted RNA was purified  
242 from the reaction mixture with the Zymo RNA Clean & Concentrator-5 kit (Zymo  
243 Research, Irvine, CA) according to manufacturer instructions and eluted in 12 µl  
244 nuclease-free water. Finally, 5 µl of the eluted RNA was input to the library prep using  
245 NEBNext® Ultra II Directional RNA Library Prep Kit for Illumina (New England Biolabs,  
246 Ipswich, MA).

247

248 **Analysis overview:**

249 All genomic analyses used genome build CNA3 of H99 *Cryptococcus*  
250 *neoformans* var. *grubii* (accession GCA\_000149245.3). The genome sequence and  
251 annotation were downloaded from release 39 of the Ensembl Fungi database (Kersey *et*  
252 *al.* 2016). For mapping mitochondrial rRNA genes, the original GTF downloaded from  
253 Ensembl Fungi was used. For all subsequent analyses, a modified GTF was used which  
254 included the newly mapped mitochondrial rRNA genes.

255 Analysis was performed using scripts written in the R programming language,  
256 Bash, and publicly available software detailed below. Custom R scripts used the  
257 following R and Bioconductor packages: Biostrings, BSgenome, dplyr, foreach, fs,  
258 GenomicAlignments, GenomicFeatures, ggbio, ggplot2, ggpubr, gridExtra, here, knitr,  
259 magrittr, plyr, readr, rmarkdown, Rsamtools, rstatix, rtracklayer, R.utils, stringr, tibble,  
260 tidyr, tools, utils.

261

262 **Mapping of mitochondrial rRNA genes:**

263 Coverage depth was plotted for all reads mapped to the mitochondrial  
264 chromosome for data generated from the first batch of Unenriched libraries. Visual  
265 inspection of these plots clearly indicated two regions with coverage depth several  
266 orders of magnitude higher than the rest of the chromosome. These regions do not  
267 overlap with any annotated feature in the mitochondrial chromosome. We determined  
268 the boundaries of these regions, extracted the sequences of the putative rRNA genes,  
269 and confirmed by BLASTn (Altschul *et al.* 1990) that these regions were homologous to

270 known fungal mitochondrial small (positions 16948-18316) and large (positions 6710-  
271 9326) subunit rRNA genes (Figure S1). A modified version of the *C. neoformans*  
272 genome annotation supplemented with our mitochondrial rRNA gene annotations is  
273 included (File S2).

274

### 275 **Design of rRNA targeting oligonucleotides:**

276 Short DNA oligos were designed to target all nuclear rRNA genes  
277 (CNAG\_10500, CNAG\_10501, CNAG\_10502, CNAG\_10503) and the newly annotated  
278 15S and 21S rRNA mitochondrial genes. In order to guide degradation of all rRNA by  
279 RNase H, the DNA oligos must be complementary to the rRNA and completely tile the  
280 rRNA. For simplicity and cost minimization, the design goal for rRNA targeting oligos  
281 was for them to be 50 nucleotides in length with no gaps between adjacent oligos. For  
282 genes with lengths that were not multiples of 50 nucleotides, single nucleotide gaps  
283 were introduced between oligos to allow for end-to-end coverage. Two, 55 nucleotide  
284 oligos were used to tile CNAG\_10503, which is 111bp long.

285 Oligos were validated by mapping them to the H99 genome and confirming that  
286 they tiled as expected and mapped to the antisense strand. This validation process  
287 identified several partial duplications of the mitochondrial rRNA, putative nuclear  
288 mitochondrial DNA (numts) (Hazkani-Covo *et al.* 2010), and nuclear rRNA. These  
289 duplications were found in CNAG\_04124, CNAG\_06164, CNAG\_07466, CNAG\_12145,  
290 CNAG\_12438, CNAG\_13073, and in the region between CNAG\_10503 and  
291 CNAG\_03595. CNAG\_13073 was excluded from analysis of rRNA depletion specificity  
292 because the rRNA duplication it contains is in an exon and on the sense strand,

293 meaning that reads originating from rRNA genes can be misassigned to CNAG\_13073.  
294 The other duplications do not result in spurious counts because they are either not in an  
295 exon or inserted antisense relative to the “host” gene.

296 The code used to design oligos should be applicable to other genomes; it is  
297 located within the file `generate_rnaseh_oligos.Rmd`, which is available, as described  
298 below, with the rest of the software developed for this project. This Rmarkdown  
299 document generates a TSV file in the correct format for pasting into the ordering  
300 template supplied by Eurofins; we have included a copy of the TSV generated for this  
301 project as a supplementary file (File S3). The 179 oligos were ordered from Eurofins  
302 Genomics LLC at a 10 nmol synthesis scale, with salt-free purification, resuspended to  
303 100  $\mu$ M, and shipped on dry ice. Upon receipt, all oligos were thawed, pooled,  
304 aliquoted, and stored at  $-80^{\circ}\text{C}$ . Total cost for oligos (not including shipping) was less  
305 than \$1000. This provided over 21 mL of pooled oligos (179 oligos at 120  $\mu$ L per oligo),  
306 enough for over 33,000 reactions. Therefore, while the upfront cost of oligos is  
307 substantial, the per reaction cost is about \$0.03.

308

### 309 **Bioinformatics and statistical data analyses:**

310 Basic assessments of sequence data quality were performed using FastQC  
311 (Andrews 2010) and MultiQC (Ewels *et al.* 2016). Raw sequencing reads were trimmed  
312 and filtered using `fastq-mcf` (EA-Utills version 1.04.807) (Aronesty 2011) and adapter  
313 sequences were extracted from the manufacturer-provided “Sample Sheet NextSeq  
314 E7600” template for the NEBNext® Multiplex Oligos for Illumina® (Dual Index Primers  
315 Set 1) (<https://www.neb.com/tools-and-resources/usage-guidelines/sample-sheet->

316 [nextseq-e7600](#), accessed 11/10/2020). Reads were then mapped to the genome and  
317 read counts were generated using STAR (version 2.5.4b) (Dobin *et al.* 2013). For  
318 quantification of reads mapped to genes, we use the fourth column (“counts for the 2nd  
319 read strand aligned with RNA”) of the STAR ReadsPerGene.out.tab because the  
320 NEBNext® Ultra™ II Directional RNA Library Prep uses the dUTP method for strand-  
321 specific library preparation. All sequencing was done on an Illumina NextSeq 500, which  
322 has a flow cell with four lanes that are fluidically-linked (i.e., one pool is simultaneously  
323 loaded onto all four lanes). While we expect there to be some lane effects, we expect  
324 these to be less than fluidically-independent lanes. Because of this, and for simplicity,  
325 reads were combined across all four lanes for analysis of depletion efficiency and  
326 specificity.

327

### 328 **Analysis of rRNA depletion efficiency:**

329 To calculate the percentage of rRNA reads per library, Rsamtools (version 2.2.2)  
330 was used to extract reads from the STAR generated BAM files and determine the  
331 number of reads mapped to the rRNA genes. We did not use rRNA counts generated by  
332 STAR because STAR excludes multimapping reads from per gene read counts. As  
333 discussed above, several rRNA genes are partially duplicated elsewhere in the genome.  
334 Because STAR excludes multimapping reads from gene counts, it undercounts reads  
335 mapping to the rRNA genes that are partially duplicated. We confirmed the source of  
336 reads that mapped to rRNA duplicated regions by evaluating context: the count level of  
337 these reads corresponded to the level of expression of the rRNA genes from which the  
338 duplications seem to have arisen and not the level of expression of the genes (or

339 genomic region in the case of the partial duplication of CNAG\_10500) that seem to be  
340 the “acceptor sites” of these duplications. The percentage of total reads that mapped to  
341 rRNA genes was then calculated.

342

### 343 **Enrichment correlation analyses:**

344 Per gene read counts were generated by STAR as described above. Read  
345 counts for each library were combined across all four lanes using  
346 DESeq2::collapseReplicates, each library’s counts were normalized by its size factor,  
347 then an average count per gene was calculated for each enrichment method across all  
348 replicates. The mean normalized count of the Unenriched replicate libraries was  
349 considered the “gold standard” count for each gene. Specificity of each enrichment  
350 method was determined by calculating the Pearson correlation of the mean normalized  
351 count for each enrichment method with the Unenriched gold standard. Variation among  
352 the Unenriched libraries was quantified by cross-correlation: Pearson correlation was  
353 calculated for each Unenriched replicate library with the normalized mean of the other  
354 five Unenriched replicate libraries. Scatterplots were generated to visualize the  
355 correlation of replicate enriched libraries with the Unenriched gold standard. While  
356 calculation of mean normalized counts used all replicates for each method, scatterplots  
357 are only shown for one technical replicate of each RNA sample for each enrichment  
358 method. In addition to analyses across all genes, calculation of Pearson correlation and  
359 generation of scatterplots was repeated for subsets of genes, as annotated for  
360 “gene\_biotype”: protein-coding genes, ncRNA, and tRNA, according to each gene’s



361 annotation. rRNA genes and CNAG\_13073 were excluded from all correlation analyses  
362 and scatterplots.

363 To determine specifically which genes seem to be “lost” by the Poly(A) isolation  
364 method, we identified genes with counts at least eight-fold lower in the Poly(A)-treated  
365 libraries than in the Unenriched libraries, after first excluding genes with very low  
366 expression in the Unenriched libraries (genes with less than 50 total read counts across  
367 all Unenriched libraries). These thresholds were chosen to identify obvious outliers in  
368 the Poly(A)-treated libraries, and were confirmed by visual inspection of the identified  
369 genes (Figure S6). We selected these thresholds to be more conservative than  
370 thresholds commonly used to identify genes with biologically relevant differences in  
371 expression (total reads of at least 10 and fold change of at least 2).

372

### 373 **LncRNA analysis:**

374 To identify novel lncRNA, we applied LncPipe (Zhao *et al.* 2018) to the data  
375 generated from the RNase H and Ribo-Zero enriched libraries and the Unenriched RNA  
376 libraries; Poly(A) enriched libraries were not included because they were expected to  
377 contain few, if any, reads derived from lncRNA. The published version of LncPipe only  
378 appears to work with data generated from human samples, so we forked the LncPipe  
379 repository and modified it to enable analysis of *C. neoformans* data. Details of the  
380 forked repository are provided below.

381 We developed an Rmarkdown document to perform all necessary pre-processing  
382 for running LncPipe (Zhao *et al.* 2018). This pre-processing involved automated  
383 reformatting of the input GTF file, preparing a subset of the GTF containing only protein-

384 coding genes and another subset containing only non-protein-coding genes, generating  
385 a *C. neoformans* specific model for CPAT (one component of LncPipe), and generating  
386 a Bash script which itself runs LncPipe. LncPipe itself was run in Singularity with the  
387 bioinformatist/lncpipe Docker image built by the LncPipe developers  
388 ([https://hub.docker.com/layers/bioinformatist/lncpipe/latest/images/sha256-  
389 9d97261556d0a3b243d4aa3eccf4d65e458037e31d9abb959f84b6fe54bb99a2?context  
390 =explore](https://hub.docker.com/layers/bioinformatist/lncpipe/latest/images/sha256-9d97261556d0a3b243d4aa3eccf4d65e458037e31d9abb959f84b6fe54bb99a2?context=explore)). Within LncPipe, STAR was used for mapping reads and the file step,  
391 LncPipeReporter, was not run.

392

### 393 **Data and reagent availability:**

394 The RNA-Seq data analyzed in this publication have been deposited in NCBI's  
395 Gene Expression Omnibus (GEO) (Edgar *et al.* 2002) and will be accessible through  
396 GEO Series accession number GSE160397  
397 (<https://www.ncbi.nlm.nih.gov/geo/query/acc.cgi?acc=GSE160397>). The custom  
398 programs developed for processing and analyzing the RNA-Seq data are available in a  
399 GitHub repository ([https://github.com/granek/rna\\_enrichment](https://github.com/granek/rna_enrichment)) and the version of the  
400 LncPipe pipeline that we modified to run on the H99 genome is available in a GitHub  
401 repository (<https://github.com/granek/LncPipe>) that was forked from the original. For  
402 purposes of reproducibility, all analyses were run within Singularity containers (v 3.5.2).  
403 All lncRNA discovery was performed using the bioinformatist/lncpipe Docker image (run  
404 within Singularity) provided by the LncPipe developers  
405 ([https://hub.docker.com/layers/bioinformatist/lncpipe/latest/images/sha256-  
406 9d97261556d0a3b243d4aa3eccf4d65e458037e31d9abb959f84b6fe54bb99a2?context](https://hub.docker.com/layers/bioinformatist/lncpipe/latest/images/sha256-9d97261556d0a3b243d4aa3eccf4d65e458037e31d9abb959f84b6fe54bb99a2?context)

407 [=explore](#)). All other analyses were performed using a Singularity image which we built  
408 and is publicly available (`library://granek/published/rna_enrichment`). These resources  
409 include all programs, support files, and instructions for automatically replicating all  
410 analyses presented here using the data available from GEO.

411 Figure S1 contains a depth of coverage plot of the mitochondrial rRNA genes.  
412 Figures S2, S3, and S4 display scatterplot visualizations of rRNA depletion specificity  
413 summarized in Figures 2, 3, and 4, respectively. Figure S5 displays the rRNA depletion  
414 efficiency for ncRNA genes, excluding CNAG\_12993. Figure S6 displays a scatterplot  
415 visualization of the genes that are underrepresented by the Poly(A) isolation method  
416 and Table S1 provides details of these genes. File S1 contains the RNase H depletion  
417 protocol. File S2 contains the Ensembl GTF with newly annotated mitochondrial rRNA.  
418 File S3 contains DNA oligonucleotide sequences used in the RNase H depletion  
419 method. All supplementary information has been deposited in figshare.

420

421

## RESULTS

### 422 **RNase H depletion is most efficient in removing rRNA:**

423 We focus the majority of our analyses on the RNase H depletion and Poly(A)  
424 isolation methods, because, of the three RNA enrichment methods assessed here, they  
425 are the two that are still available for use. To provide some context to our RNase H  
426 depletion method results, we also include analyses on the Ribo-Zero depletion method,  
427 which was frequently used in fungal RNA-Seq experiments before its discontinuation.

428 As an initial assessment, we evaluated the efficiency with which each enrichment  
429 method removed rRNA. To do so, we quantified the percentage of total reads that

430 mapped to rRNA genes for each method and compared these percentages to those of  
431 Unenriched RNA control libraries generated by sequencing identical RNA samples  
432 without any enrichment. As expected, the vast majority (~90-92%) of reads in the  
433 Unenriched RNA control libraries map to rRNA genes (Figure 1). Both the RNase H-  
434 treated libraries (~1.5-2.5%) and the Poly(A)-treated libraries (~3-5%) display a  
435 significant reduction in the percentage of reads mapping to rRNA genes (Figure 1). The  
436 Ribo-Zero depletion method was previously demonstrated to be efficient in depleting  
437 fungal rRNA and was used successfully in RNA-Seq applications for various fungi  
438 (Illumina; Trevijano-Contador *et al.* 2018; Liu *et al.* 2020). We similarly evaluated the  
439 Ribo-Zero depletion method and observed that the number of mapped rRNA reads is  
440 significantly higher in the Ribo-Zero-treated libraries (~21-85%) than in the RNase H-  
441 treated and Poly(A)-treated libraries (Figure 1). Overall, both the RNase H depletion and  
442 Poly(A) isolation methods demonstrate robust efficiency in removing fungal rRNA, with  
443 the RNase H depletion method modestly outperforming the commonly-used Poly(A)  
444 isolation method.

445

446 **RNase H depletion more accurately preserves true levels of non-rRNA than**

447 **Poly(A) isolation:**

448 To compare the specificity of the three RNA enrichment methods, we determined  
449 the correlation between read counts in the enriched libraries to read counts in the  
450 Unenriched RNA control libraries generated from the same samples. To do so, we first  
451 calculated the correlation coefficient between normalized reads mapped to all non-rRNA  
452 genes from all Unenriched RNA samples, in order to determine the maximum

453 achievable correlation between libraries. As expected, we observed that the Unenriched  
454 RNA samples are highly correlated ( $R = 0.983-0.997$ ), demonstrating reproducibility  
455 between samples and batches (Figure 2A).

456 We compared the abilities of the RNase H depletion method and the Poly(A)  
457 isolation method to preserve all non-rRNA following rRNA depletion. To do so, we  
458 calculated the correlation coefficient between normalized reads mapped to all non-rRNA  
459 genes in RNase H-treated/Poly(A)-treated libraries and normalized reads mapped to all  
460 non-rRNA genes from the Unenriched RNA control libraries. We found that the RNase  
461 H-treated libraries ( $R = 0.974-0.982$ ) display a much better correlation with the  
462 Unenriched RNA control libraries than the Poly(A)-treated libraries ( $R = 0.793-0.820$ ) for  
463 all reads mapping to non-rRNA genes (Figures 2B & S2). We similarly assessed the  
464 Ribo-Zero depletion method for preservation of all non-rRNA. Ribo-Zero-treated libraries  
465 ( $R = 0.932-0.954$ ) display a much better correlation with the Unenriched libraries than  
466 the Poly(A)-treated libraries, but a slightly weaker correlation than the RNase H-treated  
467 libraries for reads mapping to all non-rRNA genes (Figure 2B & S2). This observation  
468 suggests that the RNase H depletion method may be more specific than the Poly(A)  
469 isolation and the Ribo-Zero depletion methods, in that it maintains non-rRNA levels  
470 observed in the Unenriched RNA control libraries.

471

472 **RNase H depletion more accurately preserves true levels of protein-coding RNA**  
473 **than Poly(A) isolation:**

474 We next assessed the ability of each RNA enrichment method to retain protein-  
475 coding RNA specifically. To do so, we calculated the correlation coefficient between

476 normalized reads mapped to protein-coding genes from all Unenriched RNA samples, in  
477 order to determine the maximum achievable correlation between libraries. As expected,  
478 we observed that the Unenriched RNA samples are highly correlated ( $R = 0.986-0.998$ ),  
479 demonstrating reproducibility between samples and batches (Figure 3A).

480 We compared the ability of the RNase H depletion method and the Poly(A)  
481 isolation method to preserve protein-coding RNA following rRNA depletion. To do so,  
482 we calculated the correlation coefficient between normalized reads mapped to protein-  
483 coding genes in RNase H-treated/Poly(A)-treated libraries and normalized reads  
484 mapped to protein-coding genes from the Unenriched RNA control libraries. We found  
485 that the RNase H-treated libraries ( $R = 0.985-0.990$ ) display a much better correlation  
486 with the Unenriched RNA control libraries than the Poly(A)-treated libraries ( $R = 0.810-$   
487  $0.838$ ) for all reads mapping to protein-coding genes (Figures 3B & S3). We similarly  
488 assessed the Ribo-Zero depletion method for preservation of protein-coding RNA. Ribo-  
489 Zero-treated libraries ( $R = 0.935-0.962$ ) display a better correlation with the Unenriched  
490 libraries than the Poly(A)-treated libraries, but a slightly weaker correlation than the  
491 RNase H-treated libraries for reads mapping to protein-coding genes (Figure 3B & S3).  
492 This observation demonstrates that the RNase H depletion method is more specific than  
493 both the Poly(A) isolation and Ribo-Zero depletion methods in preserving protein-coding  
494 RNA levels observed in the Unenriched RNA control libraries.

495

496 **RNase H depletion more accurately preserves true levels of ncRNA than Poly(A)**  
497 **isolation, but slightly less accurately than Ribo-Zero depletion:**

498           We next assessed the ability of each RNA enrichment method to retain ncRNA  
499 specifically. To do so, we calculated the correlation coefficient between normalized  
500 reads mapped to ncRNA genes from all Unenriched RNA samples, in order to  
501 determine the maximum achievable correlation between libraries. Again, we observed  
502 that the Unenriched RNA samples are highly correlated ( $R = 0.835-0.990$ ),  
503 demonstrating reproducibility between samples and batches (Figure 4A).

504           We compared the ability of the RNase H depletion method and the Poly(A)  
505 isolation method to preserve ncRNA following rRNA depletion. We calculated the  
506 correlation coefficient between normalized reads mapped to ncRNA genes in RNase H-  
507 treated/Poly(A)-treated libraries and normalized reads mapped to ncRNA genes from  
508 the Unenriched RNA control libraries. As expected, we found that the RNase H-treated  
509 libraries ( $R = 0.799-0.815$ ) display a much better correlation with the Unenriched RNA  
510 control libraries than the Poly(A)-treated libraries ( $R = 0.139-0.149$ ) for all reads  
511 mapping to ncRNA genes (Figures 4B & S4). This result was expected because the  
512 Poly(A) isolation method specifically enriches RNA with polyadenylation and excludes  
513 all other non-polyadenylated RNA, including ncRNA and tRNA. One key advantage of  
514 methods that specifically remove rRNA, such as the RNase H depletion and the Ribo-  
515 Zero depletion methods, is that they “ignore” all RNA that is not specifically targeted for  
516 removal. As a result, these non-polyadenylated RNA species should maintain similar  
517 levels as the input Unenriched RNA.

518           As a better assessment of the ability of the RNase H depletion method to  
519 preserve ncRNA, we compared it to the Ribo-Zero depletion method. Ribo-Zero-treated  
520 libraries ( $R = 0.897-0.967$ ) display a slightly better correlation with the Unenriched

521 libraries than the RNase H-treated libraries for reads mapping to ncRNA genes (Figure  
522 4B & S4). The higher correlation of Ribo-Zero-treated libraries with Unenriched libraries  
523 seems to be driven by CNAG\_12993, the ncRNA gene with the highest counts in the  
524 Unenriched libraries, but much lower counts in the RNase H libraries. When  
525 CNAG\_12993 is removed from analysis, the RNase H and Ribo-Zero depletion methods  
526 perform similarly (Figure S5; RNase H  $R = 0.936-0.952$ , Ribo-Zero  $R = 0.892-0.959$ ).  
527 There is no clear explanation for the poor performance of the RNase H depletion  
528 method with CNAG\_12993.

529 We also explored the ability of each enrichment method to preserve tRNA. Fewer  
530 than 10 reads mapped to each tRNA gene in all libraries, likely due to size selection in  
531 the library preparation, precluding any meaningful analysis (data not shown).

532

### 533 **LncPipe pipeline identifies novel lncRNA in the *C. neoformans* transcriptome:**

534 Because our correlation analyses demonstrated that both the RNase H depletion  
535 and the Ribo-Zero depletion methods preserve ncRNA, we took advantage of this rich  
536 RNA-Seq dataset to search for novel lncRNAs. We used an existing pipeline LncPipe  
537 (Zhao *et al.* 2018) that was developed for a subset of model organisms, and modified it  
538 for application to *C. neoformans*. We applied this modified LncPipe pipeline to identify  
539 novel lncRNA within our RNase H depletion, Ribo-Zero depletion, and Unenriched RNA  
540 datasets. Our lncRNA discovery analysis identified 11 novel lncRNA within the *C.*  
541 *neoformans* transcriptome (Table 1).

542

543

## DISCUSSION



544 RNA enrichment is essential for cost-effectively generating data from an RNA-  
545 Seq experiment. We have demonstrated here that, in *C. neoformans* cells grown in rich  
546 media, rRNA constitutes more than 90% of the total RNA; even higher percentages of  
547 rRNA have been observed in other species (Giannoukos *et al.* 2012). RNA-Seq  
548 experiments are typically aimed at quantifying protein-coding RNA, and increasingly  
549 also ncRNA. Efficient reduction of rRNA allows one to generate the desired sequencing  
550 depth of the RNA species of interest with one-tenth of the sequencing reads that would  
551 be required to generate the same depth from total, unenriched RNA.

552 To be effective, RNA enrichment methods must be efficient and specific. An  
553 efficient RNA enrichment method removes as much rRNA as possible. A specific RNA  
554 enrichment method does not affect other RNA species in the sample. We compared the  
555 rRNA removal efficiency of three commonly-used methods in *C. neoformans* samples.  
556 Application of the RNase H depletion method in *Cryptococcus* has never been reported  
557 to our knowledge. The Poly(A) isolation method (Bloom *et al.* 2019; Brown *et al.* 2020)  
558 and the now discontinued Ribo-Zero depletion method have both been used in RNA-  
559 Seq applications with *Cryptococcus* samples in the past (Illumina; Trevijano-Contador *et*  
560 *al.* 2018; Liu *et al.* 2020). We find that both the untested RNase H depletion method, as  
561 well as the frequently-used Poly(A) selection method, are very efficient in removing  
562 fungal rRNA. Surprisingly, the Ribo-Zero depletion method showed poor efficiency in *C.*  
563 *neoformans*, despite previous work showing efficient removal of various bacterial rRNA  
564 (Giannoukos *et al.* 2012). While the Ribo-Zero manufacturer predicted that the Ribo-  
565 Zero Yeast kit would work for *C. neoformans*, the probes were designed to target *S.*  
566 *cerevisiae*, which may explain the poor performance observed here. Of the three

567 methods tested, the RNase H depletion method is the most efficient in removing fungal  
568 rRNA.

569         Following the removal of rRNA, the majority of remaining RNA is typically protein-  
570 coding. Ideally, the removal of rRNA should not have any effect on protein-coding RNA.  
571 In reality, there is no known method that can reduce rRNA without having some effect  
572 on non-target RNA, including protein-coding RNA. The best available methods  
573 efficiently remove rRNA and are highly specific, having minimal side-effects on non-  
574 target RNA. When assessing the ability of these RNA enrichment methods to preserve  
575 protein-coding RNA, we observe that the RNase H depletion method is substantially  
576 more specific than the Poly(A) isolation method and somewhat more specific than the  
577 Ribo-Zero depletion method.

578         We evaluated the specificity of each RNA enrichment method in preserving  
579 ncRNA. The Poly(A) isolation method performs very poorly in preserving ncRNA; this is  
580 as expected since it depends on 3' polyadenylation, which is absent from ncRNA. The  
581 RNase H depletion and the Ribo-Zero depletion methods both perform well in  
582 preserving ncRNA, with the Ribo-Zero depletion method being slightly more specific  
583 than the RNase H depletion method.

584         To determine a possible mechanism impacting specificity of the Poly(A) isolation  
585 method, we identified the genes that were significantly underrepresented in the Poly(A)-  
586 treated libraries compared to the Unenriched libraries (Figure S6). A total of 41 genes  
587 were identified as significantly underrepresented in the Poly(A)-treated libraries; as  
588 expected, 24 of these genes are non-coding genes (Table S1). In analyzing the  
589 remaining 17 protein-coding genes that were underrepresented in the Poly(A)-treated

590 libraries, we observed a pattern. The vast majority of these genes (12 of 17) are located  
591 on the mitochondrial chromosome (Table S1). This observation is supported by  
592 previous work that has demonstrated that mitochondrial transcripts in fungi, including  
593 *Cryptococcus*, lack polyadenylation (Toffaletti *et al.* 2003; Chang and Tong 2012). From  
594 this analysis, it appears that the Poly(A) isolation method is largely specific for most  
595 protein-coding genes except for mitochondrial genes. We have not identified any  
596 characteristic that explains the five underrepresented protein coding genes that reside  
597 in the nuclear genome. These findings indicate that the Poly(A) isolation method is not  
598 well suited for RNA-Seq experiments investigating ncRNA genes, genes on the  
599 mitochondrial chromosome, or the five nuclear protein-coding genes that we found to be  
600 underrepresented in the Poly(A)-treated libraries.

601 Interest in ncRNA has recently expanded in the fungal genetics field. The  
602 majority of work has focused on ncRNAs in model systems (such as *S. cerevisiae*,  
603 *Neurospora crassa*, and *Aspergillus flavus*), in which lncRNAs and natural antisense  
604 transcripts (NATs) have been implicated in stress responses and development (Smith *et al.*  
605 *et al.* 2008; Gelfand *et al.* 2011; Ding *et al.* 2012; Xue *et al.* 2014). Little work has explored  
606 ncRNAs in pathogenic fungi. For example, RNA interference (RNAi) is known to  
607 regulate transposon activity in *C. neoformans* (Wang *et al.* 2010; Janbon *et al.* 2010;  
608 Yadav *et al.* 2018). The first lncRNA in *Cryptococcus*, *RZE1*, was recently functionally  
609 characterized. *RZE1* is required for *Cryptococcus* yeast-to-hyphal transition and  
610 virulence through its regulation of the transcription factor *ZNF2* (Chacko *et al.* 2015).  
611 Additionally, siRNAs, miRNAs, and lncRNAs are known to be secreted, albeit for an  
612 unknown purpose, by *C. deneoformans* (Liu *et al.* 2020). We have identified 11 putative

613 lncRNAs in *C. neoformans* by mining our dataset by modifying LncPipe (Zhao *et al.*  
614 2018) to run on genomic data from non-model organisms. Although many of these  
615 lncRNAs were not highly expressed in the evaluated condition, they may be interesting  
616 candidates to pursue for novel biological activity in conditions relevant to fungal  
617 pathogenesis, because many fungal ncRNAs are induced in response to stressful  
618 stimuli. Furthermore, the *C. neoformans* genome may contain undiscovered lncRNAs  
619 that are not expressed in the rich growth conditions used here.

620 In conclusion, of the three RNA enrichment methods compared here, we  
621 consider the Poly(A) isolation method to have poor overall effectiveness. It does  
622 efficiently reduce rRNA reads (although not as efficiently as the RNase H depletion  
623 method), but it results in a biased enrichment of protein-coding transcripts. The RNase  
624 H depletion and the Ribo-Zero depletion methods both display strengths and  
625 weaknesses. The RNase H depletion method performs better in efficiency of rRNA  
626 reduction and specificity for protein-coding transcripts, while the Ribo-Zero depletion  
627 method performs moderately better in specificity for ncRNA. While this work was being  
628 conducted, the Ribo-Zero product line was discontinued. It has since been replaced with  
629 the Illumina Ribo-Zero Plus rRNA Depletion Kit, which only targets human, mouse, rat,  
630 and bacterial rRNA. As a result, we conclude that the RNase H method may be the best  
631 option for RNA-Seq analysis of *C. neoformans*, as well as many other non-model  
632 organisms. While the RNase H depletion method has a substantial upfront cost to  
633 purchase DNA oligonucleotides (approximately \$1000), we estimate that for this method  
634 our total cost per sample was less than \$6.50 (more than half of this total was the final  
635 cleanup with the Zymo RNA Clean & Concentrator-5 kit).

636

637

## ACKNOWLEDGEMENTS

638

639

640

641

642

643

644

645

646

## FIGURE LEGENDS

647

648

649

650

651

652

653

654

655

656

657

658

We thank the Duke University School of Medicine for the use of the Microbiome Shared Resource, which provided RNA quality assessments. We also thank the Duke University School of Medicine for the use of the Sequencing and Genomic Technologies Shared Resource, which provided all sequencing services used for this project. This work was made possible by funding from the National Institute of Biomedical Imaging and Bioengineering (grant #5R25EB023928) received by KO and CC, and R01 grant AI074677 to JAA and JAG.

**Figure 1. rRNA depletion efficiency:** The percentage of rRNA reads in each library is graphed. The RNase H depletion method has the most efficient depletion (lowest percentage of rRNA reads), with the Poly(A) isolation method a close second, and the Ribo-Zero depletion method a distant third. Unenriched libraries show that rRNA makes up most of the RNA in *C. neoformans*.

**Figure 2. Specificity of rRNA depletion for all genes:** Pearson correlations were calculated for normalized read counts of all annotated genes in the *C. neoformans* genome, excluding rRNA genes and genes containing coding-strand rRNA duplications.

A. Unenriched libraries have high internal consistency as determined by leave-one-out cross correlation of each Unenriched library with the mean of other Unenriched libraries.

B. The RNase H depletion method has the best overall rRNA depletion specificity, as

659 determined by Pearson correlation of read counts for all genes with the Unenriched  
660 libraries. Pearson correlation coefficient (R) was calculated between each enriched  
661 library and the gold standard, the gene-wise average of counts across all Unenriched  
662 library replicates.

663

664 **Figure 3. Specificity of rRNA depletion for protein-coding genes:** Pearson  
665 correlations were calculated in the same way as Figure 2, but only for protein-coding  
666 genes, excluding genes containing coding-strand rRNA duplications. A. Unenriched  
667 libraries have high internal consistency for protein-coding genes. B. The RNase H  
668 depletion method has the best rRNA depletion specificity for protein-coding genes.

669

670 **Figure 4. Specificity of rRNA depletion for ncRNA genes:** Pearson correlations were  
671 calculated in the same way as Figure 2, but only for ncRNA genes, excluding rRNA  
672 genes. A. Unenriched libraries have high internal consistency for ncRNA genes. B. The  
673 Ribo-Zero depletion method has the best rRNA depletion specificity for ncRNA genes.

674

675

#### TABLE LEGEND

676 **Table 1. LncPipe identification of novel *C. neoformans* lncRNA:** Putative lncRNAs  
677 were discovered by analysis of RNase H-treated, Ribo-Zero-treated, and Unenriched  
678 RNA libraries. The name (assigned by LncPipe), chromosomal location, exon number,  
679 exonic length, and transcripts per million (TPM) across samples are shown for all 11  
680 novel lncRNA identified.

681

682

## SUPPLEMENTARY MATERIAL

683 **Figure S1. Visualization of mitochondrial rRNA genes in *C. neoformans* H99**

684 **strain:** The depth of coverage plot of the whole H99 mitochondrial chromosome is  
685 shown. The *C. neoformans* large and small mitochondrial rRNA genes are clearly  
686 identified as the two regions of the mitochondrial genome with depth of coverage that is  
687 much higher than any other part of the chromosome.

688

689 **Figure S2. Scatterplot visualization of rRNA depletion specificity for all genes:** In

690 the RNase H- and Ribo-Zero-treated libraries, most genes have counts that are highly  
691 correlated with the Unenriched libraries, whereas Poly(A)-treated libraries have low  
692 counts for a number of expressed genes. For each biological replicate (subplot columns  
693 labeled “A”, “B”, and “C”), per-gene normalized read counts for each enrichment method  
694 are plotted as a function of the gold standard (normalized read counts averaged across  
695 the Unenriched libraries). All annotated genes in the *C. neoformans* genome are  
696 plotted, excluding rRNA genes and genes containing coding-strand rRNA duplications.  
697 For libraries with technical replicates (RNase H and Ribo-Zero), only one of the  
698 replicates is shown.

699

700 **Figure S3. Scatterplot visualization of rRNA depletion specificity for protein-**

701 **coding genes:** In the RNase H- and Ribo-Zero-treated libraries, most protein-coding  
702 genes have counts that are highly correlated with the Unenriched libraries, whereas  
703 Poly(A)-treated libraries have low counts for a number of protein-coding genes. This plot

704 is the same as Figure S2, but only shows protein-coding genes, excluding genes  
705 containing coding-strand rRNA duplications.

706

707 **Figure S4. Scatterplot visualization of rRNA depletion specificity for ncRNA**

708 **genes:** In the RNase H- and Ribo-Zero-treated libraries, most ncRNA genes have  
709 counts that are well-correlated with the Unenriched libraries, whereas Poly(A)-treated  
710 libraries have low counts for almost all ncRNA genes. This plot is the same as Figure  
711 S2, but only shows ncRNA genes, excluding rRNA.

712

713 **Figure S5. Specificity of rRNA depletion for ncRNA genes, excluding**

714 **CNAG\_12993:** When outlier ncRNA gene CNAG\_12993 is excluded, the RNase H  
715 depletion method has specificity for ncRNA genes that is as good as the Ribo-Zero  
716 depletion method. Pearson correlations were calculated in the same way as Figure 4,  
717 except CNAG\_12993 was excluded from the analysis.

718

719 **Figure S6. Scatterplot visualization of all genes underrepresented by the Poly(A)**

720 **isolation method:** This plot is the same as Figure S2, with the genes that are  
721 significantly underrepresented in the Poly(A)-treated libraries colored red.

722

723 **Table S1. Genes underrepresented by the Poly(A) isolation method:** Table details

724 the genes that are significantly underrepresented in the Poly(A)-treated libraries. The  
725 gene name, chromosome, and gene type are included for each gene.

726



727 **File S1. RNase H depletion protocol:** The detailed protocol used to perform the  
728 RNase H depletion.

729

730 **File S2. Ensembl GTF with newly annotated mitochondrial rRNA:** A copy of the  
731 GTF genome annotation file for CNA3 of H99 *Cryptococcus neoformans* var. *grubii*,  
732 modified to include annotation for the mitochondrial rRNA genes.

733

734 **File S3. RNase H rRNA-targeting oligonucleotides:** DNA oligonucleotide sequences  
735 used in the RNase H depletion method to target H99 *C. neoformans* rRNA. This file was  
736 formatted to be directly pasted into the Eurofins order form.

737

738

#### LITERATURE CITED

739 Adiconis, X., D. Borges-Rivera, R. Satija, D. S. Deluca, M. A. Busby *et al.*, 2013

740 Comparative analysis of RNA sequencing methods for degraded or low-input  
741 samples. *Nat. Methods*. 10: 623–629.

742 Altschul, S. F., W. Gish, W. Miller, E. W. Myers, and D. J. Lipman, 1990 Basic local  
743 alignment search tool. *J. Mol. Biol.* 215: 403–410.

744 Andrews, S., 2010 FastQC: A quality control tool for high throughput sequence data.

745 Available online at: <http://www.bioinformatics.babraham.ac.uk/projects/fastqc/>.

746 Aronesty, E., 2011 ea-utils : Command-line tools for processing biological sequencing  
747 data. Available online at: <http://expressionanalysis.github.io/ea-utils/>.

748 Atkinson, S. R., S. Marguerat, D. A. Bitton, M. Rodríguez-López, C. Rallis *et al.*, 2018

749 Long noncoding RNA repertoire and targeting by nuclear exosome, cytoplasmic

- 750 exonuclease, and RNAi in fission yeast. *RNA* 24: 1195–1213.
- 751 Barrett, T., S. E. Wilhite, P. Ledoux, C. Evangelista, I. F. Kim *et al.*, 2013 NCBI GEO:  
752 Archive for functional genomics data sets - Update. *Nucleic Acids Res.* 41: D991–  
753 D995.
- 754 Bird, A. J., M. Gordon, D. J. Eide, and D. R. Winge, 2006 Repression of *ADH1* and  
755 *ADH3* during zinc deficiency by Zap1-induced intergenic RNA transcripts. *EMBO J.*  
756 25: 5726–5734.
- 757 Bloom, A. L. M., R. M. Jin, J. Leipheimer, J. E. Bard, D. Yergeau *et al.*, 2019  
758 Thermotolerance in the pathogen *Cryptococcus neoformans* is linked to antigen  
759 masking via mRNA decay-dependent reprogramming. *Nat. Commun.* 10: 1–13.
- 760 Brown, H. E., K. S. Ost, S. K. Esher, K. M. Pinalto, J. W. Saelens *et al.*, 2018  
761 Identifying a novel connection between the fungal plasma membrane and pH-  
762 sensing. *Mol. Microbiol.* 109: 474–493.
- 763 Brown, H. E., C. L. Telzrow, J. W. Saelens, L. Fernandes, and J. A. Alspaugh, 2020  
764 Sterol-response pathways mediate alkaline survival in diverse fungi. *mBio* 11:  
765 e00719-20.
- 766 Bumgarner, S. L., R. D. Dowell, P. Grisafi, D. K. Gifford, and G. R. Fink, 2009 Toggle  
767 involving cis-interfering noncoding RNAs controls variegated gene expression in  
768 yeast. *Proc. Natl. Acad. Sci. U. S. A.* 106: 18321–18326.
- 769 Bumgarner, S. L., G. Neuert, B. F. Voight, A. Symbor-Nagrabska, P. Grisafi *et al.*, 2011  
770 Single-cell analysis reveals that noncoding RNAs contribute to clonal heterogeneity  
771 by modulating transcription factor recruitment. *Mol. Cell* 45: 470–482.
- 772 Chacko, N., Y. Zhao, E. Yang, L. Wang, J. J. Cai *et al.*, 2015 The lncRNA *RZE1*

- 773 controls cryptococcal morphological transition. *PLoS Genet.* 11: e1005692.
- 774 Chang, Y. C., A. K. Lamichhane, H. M. Garraffo, P. J. Walter, and M. Leerkes, 2014
- 775 Molecular mechanisms of hypoxic responses via unique roles of Ras1, Cdc24 and
- 776 Ptp3 in a human fungal pathogen *Cryptococcus neoformans*. *PLoS Genet.* 10:
- 777 e1004292.
- 778 Chang, J. H., and L. Tong, 2012 Mitochondrial poly(A) polymerase and polyadenylation.
- 779 *Biochim. Biophys. Acta* 1819: 992–997.
- 780 Chen, Y., D. L. Toffaletti, J. L. Tenor, A. P. Litvintseva, C. Fang *et al.*, 2014 The
- 781 *Cryptococcus neoformans* transcriptome at the site of human meningitis. *mBio* 5:
- 782 e01087-13.
- 783 Chow, E. W. L., S. A. Clancey, R. Blake Billmyre, A. F. Averette, J. A. Granek *et al.*,
- 784 2017 Elucidation of the calcineurin-Crz1 stress response transcriptional network in
- 785 the human fungal pathogen *Cryptococcus neoformans*. *PLoS Genet.* 13: e1006667.
- 786 Ding, D. Q., K. Okamasa, M. Yamane, C. Tsutsumi, T. Haraguchi *et al.*, 2012 Meiosis-
- 787 specific noncoding RNA mediates robust pairing of homologous chromosomes in
- 788 meiosis. *Science* 336: 732–736.
- 789 Dobin, A., C. A. Davis, F. Schlesinger, J. Drenkow, C. Zaleski *et al.*, 2013 STAR:
- 790 Ultrafast universal RNA-seq aligner. *Bioinformatics* 29: 15–21.
- 791 Edgar, R., M. Domrachev, and A. E. Lash, 2002 Gene Expression Omnibus: NCBI gene
- 792 expression and hybridization array data repository. *Nucleic Acids Res.* 30: 207–
- 793 210.
- 794 Ewels, P., M. Magnusson, S. Lundin, and M. Käller, 2016 MultiQC: Summarize analysis
- 795 results for multiple tools and samples in a single report. *J. Bioinform.* 32: 3047–

796 3048.

797 Fan, W., P. R. Kraus, M. J. Boily, and J. Heitman, 2005 *Cryptococcus neoformans* gene  
798 expression during murine macrophage infection. *Eukaryot. Cell* 4: 1420–1433.

799 Gelfand, B., J. Mead, A. Bruning, N. Apostolopoulos, V. Tadigotla *et al.*, 2011 Regulated  
800 antisense transcription controls expression of cell-type-specific genes in yeast. *Mol.*  
801 *Cell. Biol.* 31: 1701–1709.

802 Giannoukos, G., D. M. Ciulla, K. Huang, B. J. Haas, J. Izard *et al.*, 2012 Efficient and  
803 robust RNA-seq process for cultured bacteria and complex community  
804 transcriptomes. *Genome Biol.* 13: r23.

805 Gish, S. R., E. J. Maier, B. C. Haynes, F. H. Santiago-Tirado, D. L. Srikanta *et al.*, 2016  
806 Computational analysis reveals a key regulator of cryptococcal virulence and  
807 determinant of host response. *mBio* 7: e00313-16.

808 Hazkani-Covo, E., R. M. Zeller, and W. Martin, 2010 Molecular poltergeists:  
809 Mitochondrial DNA copies (numts) in sequenced nuclear genomes. *PLoS Genet.* 6:  
810 e1000834.

811 Illumina. Ribo-Zero Kit Species Compatibility Tables. Available online at:  
812 <https://www.tst-web.illumina.com/content/illumina->  
813 [marketing/amr/en/products/selection-tools/ribo-zero-kit-species-compatibility.html](https://www.tst-web.illumina.com/content/illumina-marketing/amr/en/products/selection-tools/ribo-zero-kit-species-compatibility.html).

814 Isenbarger, T. A., C. E. Carr, S. S. Johnson, M. Finney, G. M. Church *et al.*, 2008 The  
815 most conserved genome segments for life detection on earth and other planets.  
816 *Orig. Life Evol. Biosph.* 38: 517–533.

817 Janbon, G., S. Maeng, D. H. Yang, Y. J. Ko, K. W. Jung *et al.*, 2010 Characterizing the  
818 role of RNA silencing components in *Cryptococcus neoformans*. *Fungal Genet.*

- 819 Biol. 47: 1070–1080.
- 820 Janbon, G., K. L. Ormerod, D. Paulet, E. J. Byrnes, V. Yadav *et al.*, 2014 Analysis of the  
821 genome and transcriptome of *Cryptococcus neoformans* var. *grubii* reveals  
822 complex RNA expression and microevolution leading to virulence attenuation.  
823 PLoS Genet. 10: e1004261.
- 824 Jiang, N., Y. Yang, G. Janbon, J. Pan, and X. Zhu, 2012 Identification and functional  
825 demonstration of miRNAs in the fungus *Cryptococcus neoformans*. PLOS One 7:  
826 e52734.
- 827 Kersey, P. J., J. E. Allen, I. Armean, S. Boddu, B. J. Bolt *et al.*, 2016 Ensembl Genomes  
828 2016: More genomes, more complexity. Nucleic Acids Res. 44: D574–D580.
- 829 Liu, M., Z. Zhang, C. Ding, T. Wang, B. Kelly *et al.*, 2020 Transcriptomic analysis of  
830 extracellular RNA governed by the endocytic adaptor protein Cin1 of *Cryptococcus*  
831 *deneoformans*. Front. Cell. Infect. Microbiol. 10: 256.
- 832 Morlan, J. D., K. Qu, and D. V. Sinicropi, 2012 Selective depletion of rRNA enables  
833 whole transcriptome profiling of archival fixed tissue. PLOS One 7: e42882.
- 834 Parker, S., M. G. Fraczek, J. Wu, S. Shamsah, A. Manousaki *et al.*, 2018 Large-scale  
835 profiling of noncoding RNA function in yeast. PLoS Genet. 14: e1007253.
- 836 Rajasingham, R., R. M. Smith, B. J. Park, J. N. Jarvis, N. P. Govender *et al.*, 2017  
837 Global burden of disease of HIV-associated cryptococcal meningitis: an updated  
838 analysis. Lancet Infect. Dis. 17: 873–881.
- 839 Smith, C. A., D. Robertson, B. Yates, D. M. Nielsen, D. Brown *et al.*, 2008 The effect of  
840 temperature on Natural Antisense Transcript (NAT) expression in *Aspergillus*  
841 *flavus*. Curr. Genet. 54: 241–269.

- 842 Toffaletti, D. L., M. Del Poeta, T. H. Rude, F. Dietrich, and J. R. Perfect, 2003  
843 Regulation of cytochrome c oxidase subunit 1 (*COX1*) expression in *Cryptococcus*  
844 *neoformans* by temperature and host environment. *Microbiology* 149: 1041–1049.
- 845 Trevijano-Contador, N., H. C. de Oliveira, R. García-Rodas, S. A. Rossi, I. Llorente *et*  
846 *al.*, 2018 *Cryptococcus neoformans* can form titan-like cells in vitro in response to  
847 multiple signals. *PLoS Pathog.* 14: e1007007.
- 848 Wang, X., Y. P. Hsueh, W. Li, A. Floyd, R. Skalsky *et al.*, 2010 Sex-induced silencing  
849 defends the genome of *Cryptococcus neoformans* via RNAi. *Genes Dev.* 24: 2566–  
850 2582.
- 851 Xue, Z., Q. Ye, S. R. Anson, J. Yang, G. Xiao *et al.*, 2014 Transcriptional interference  
852 by antisense RNA is required for circadian clock function. *Nature* 514: 650–653.
- 853 Yadav, V., S. Sun, R. B. Billmyre, B. C. Thimmappa, T. Shea *et al.*, 2018 RNAi is a  
854 critical determinant of centromere evolution in closely related fungi. *Proc. Natl.*  
855 *Acad. Sci. U. S. A.* 115: 3108–3113.
- 856 Yi, H., Y.-J. Cho, S. Won, J.-E. Lee, H. J. Yu *et al.*, 2011 Duplex-specific nuclease  
857 efficiently removes rRNA for prokaryotic RNA-seq. *Nucleic Acids Res.* 39: e140.
- 858 Yu, C.-H., Y. Chen, C. A. Desjardins, J. L. Tenor, D. L. Toffaletti *et al.*, 2020 Landscape  
859 of gene expression variation of natural isolates of *Cryptococcus neoformans* in  
860 response to biologically relevant stresses. *Microb. Genomics* 6.
- 861 Zhao, W., X. He, K. A. Hoadley, J. S. Parker, D. N. Hayes *et al.*, 2014 Comparison of  
862 RNA-Seq by poly (A) capture, ribosomal RNA depletion, and DNA microarray for  
863 expression profiling. *BMC Genomics* 15: 419.
- 864 Zhao, Q., Y. Sun, D. Wang, H. Zhang, K. Yu *et al.*, 2018 LncPipe: A Nextflow-based

865 pipeline for identification and analysis of long non-coding RNAs from RNA-Seq  
866 data. J. Genet. Genomics 45: 399–401.

867

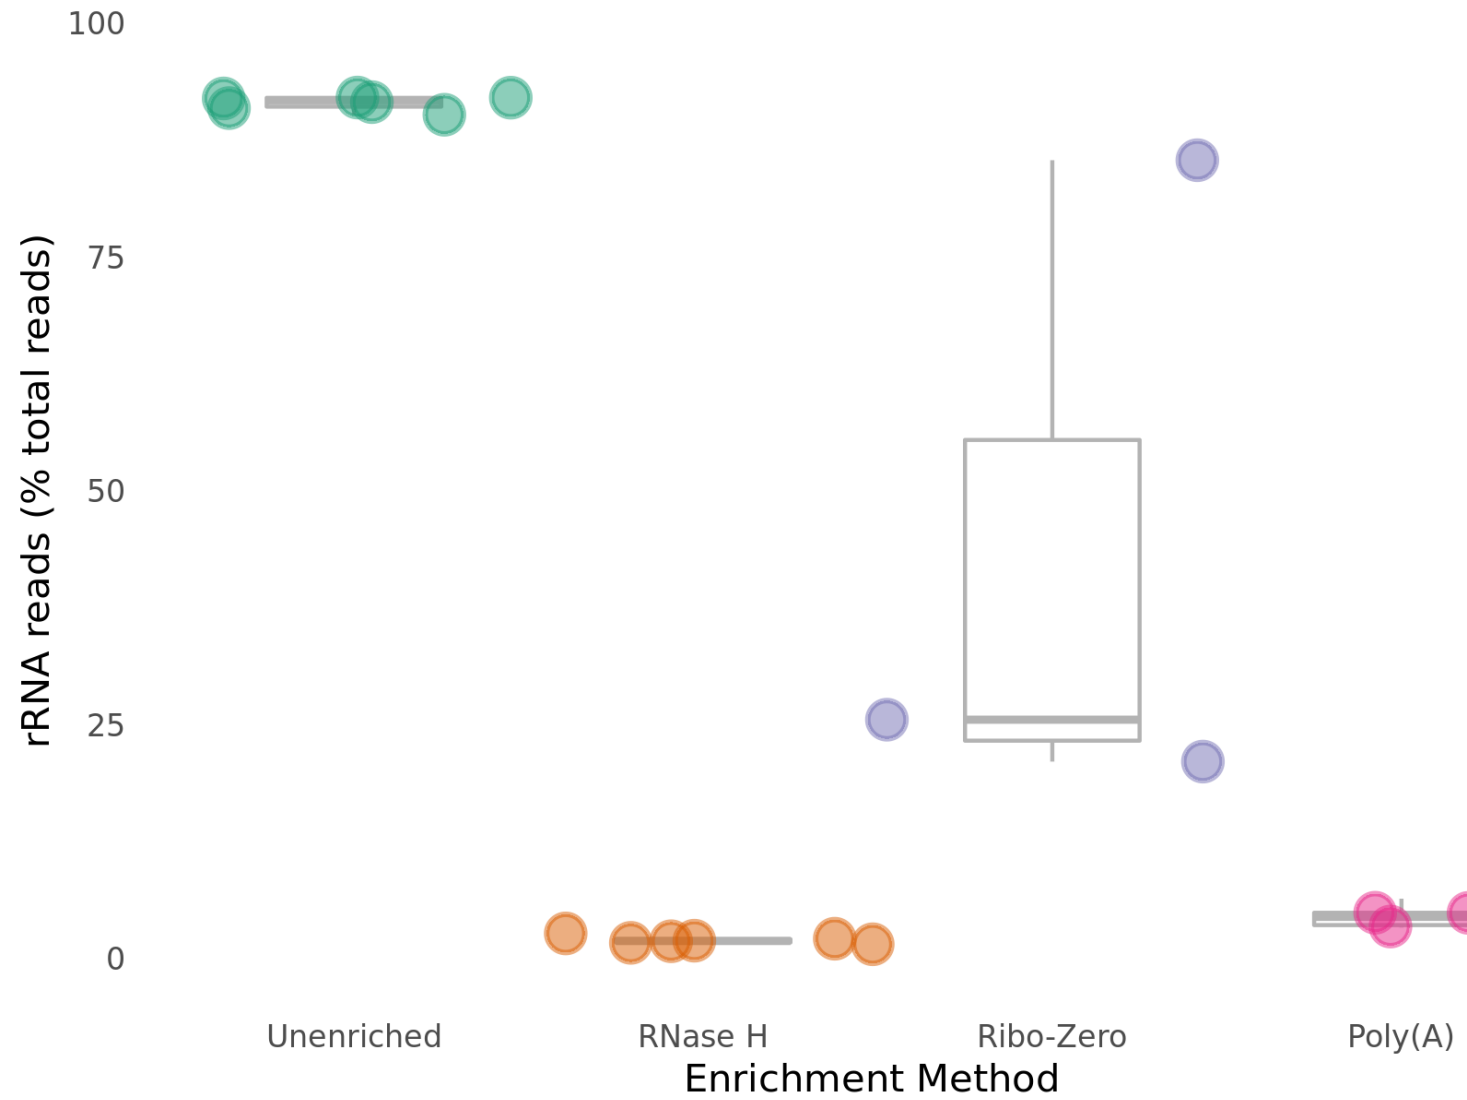



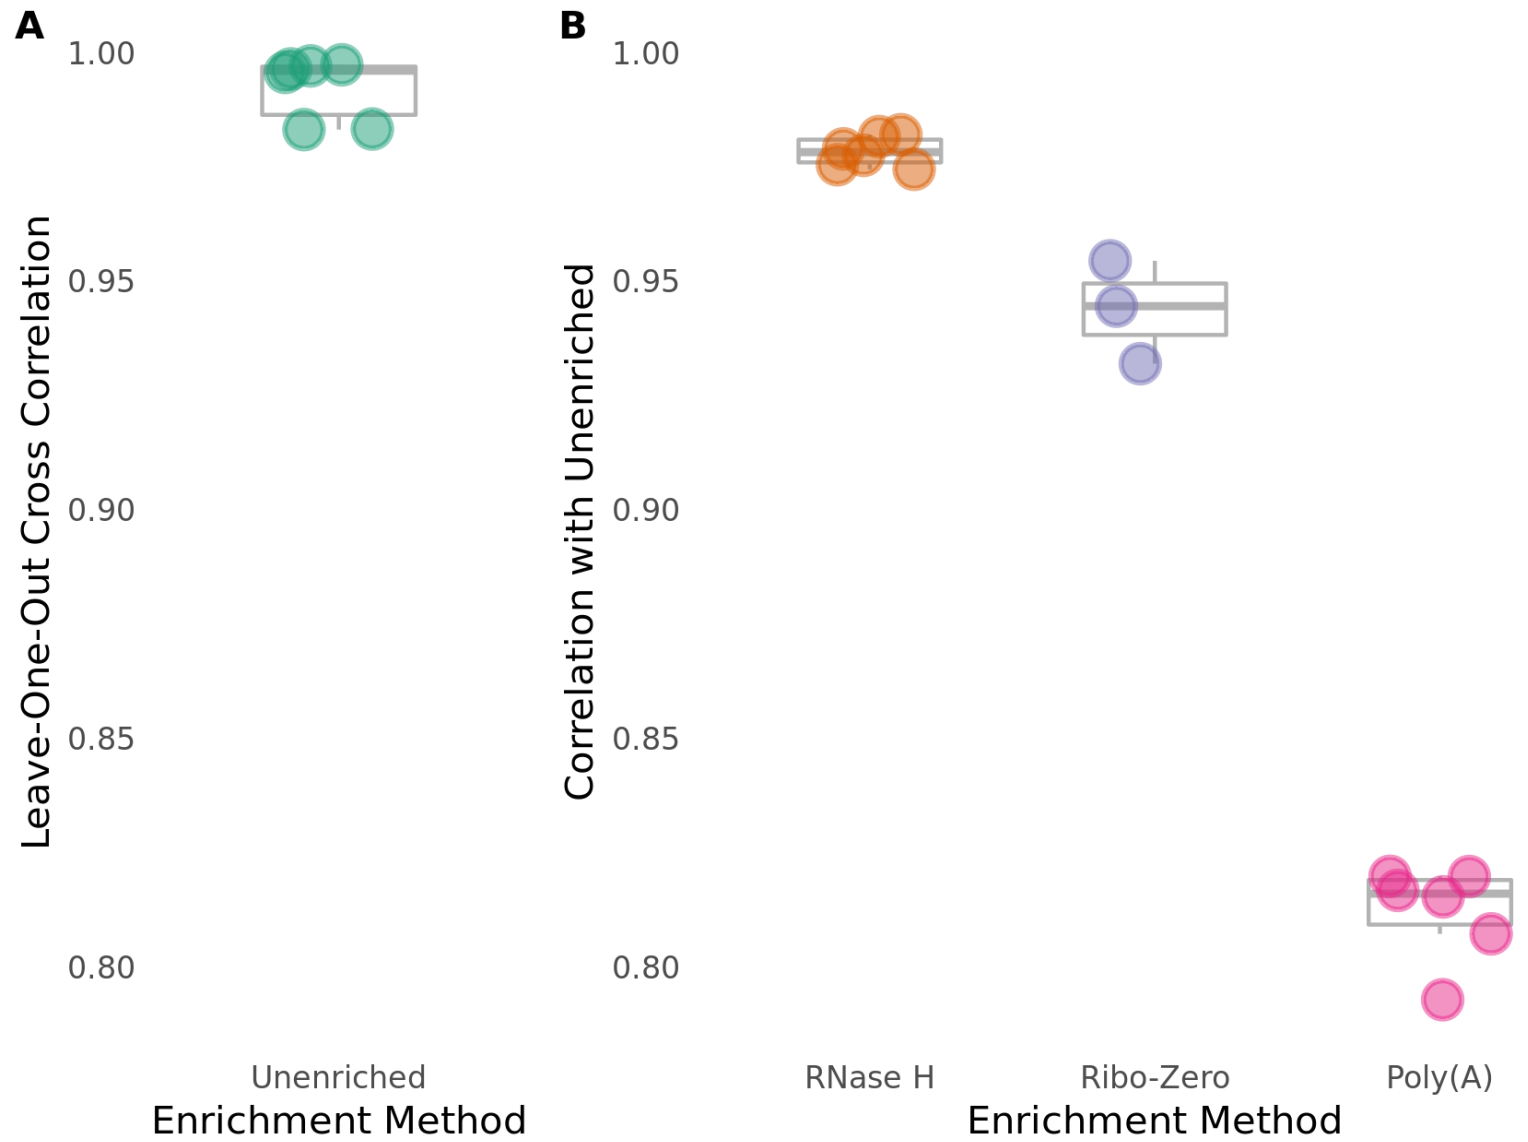

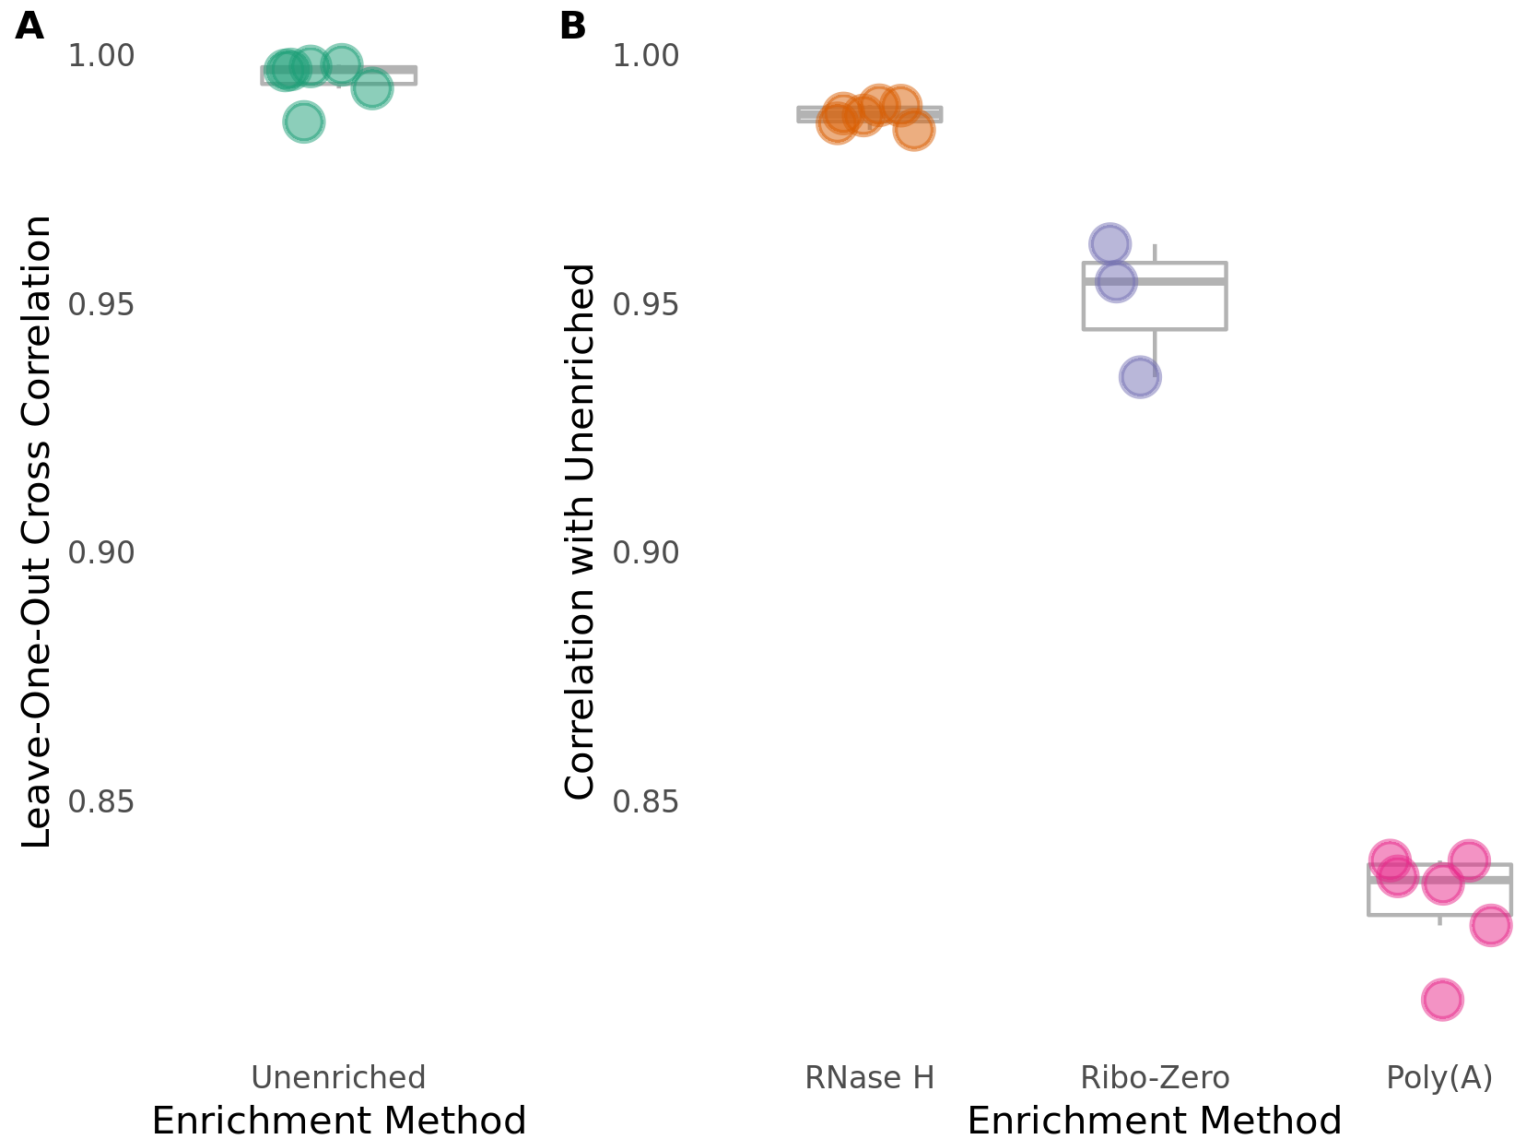

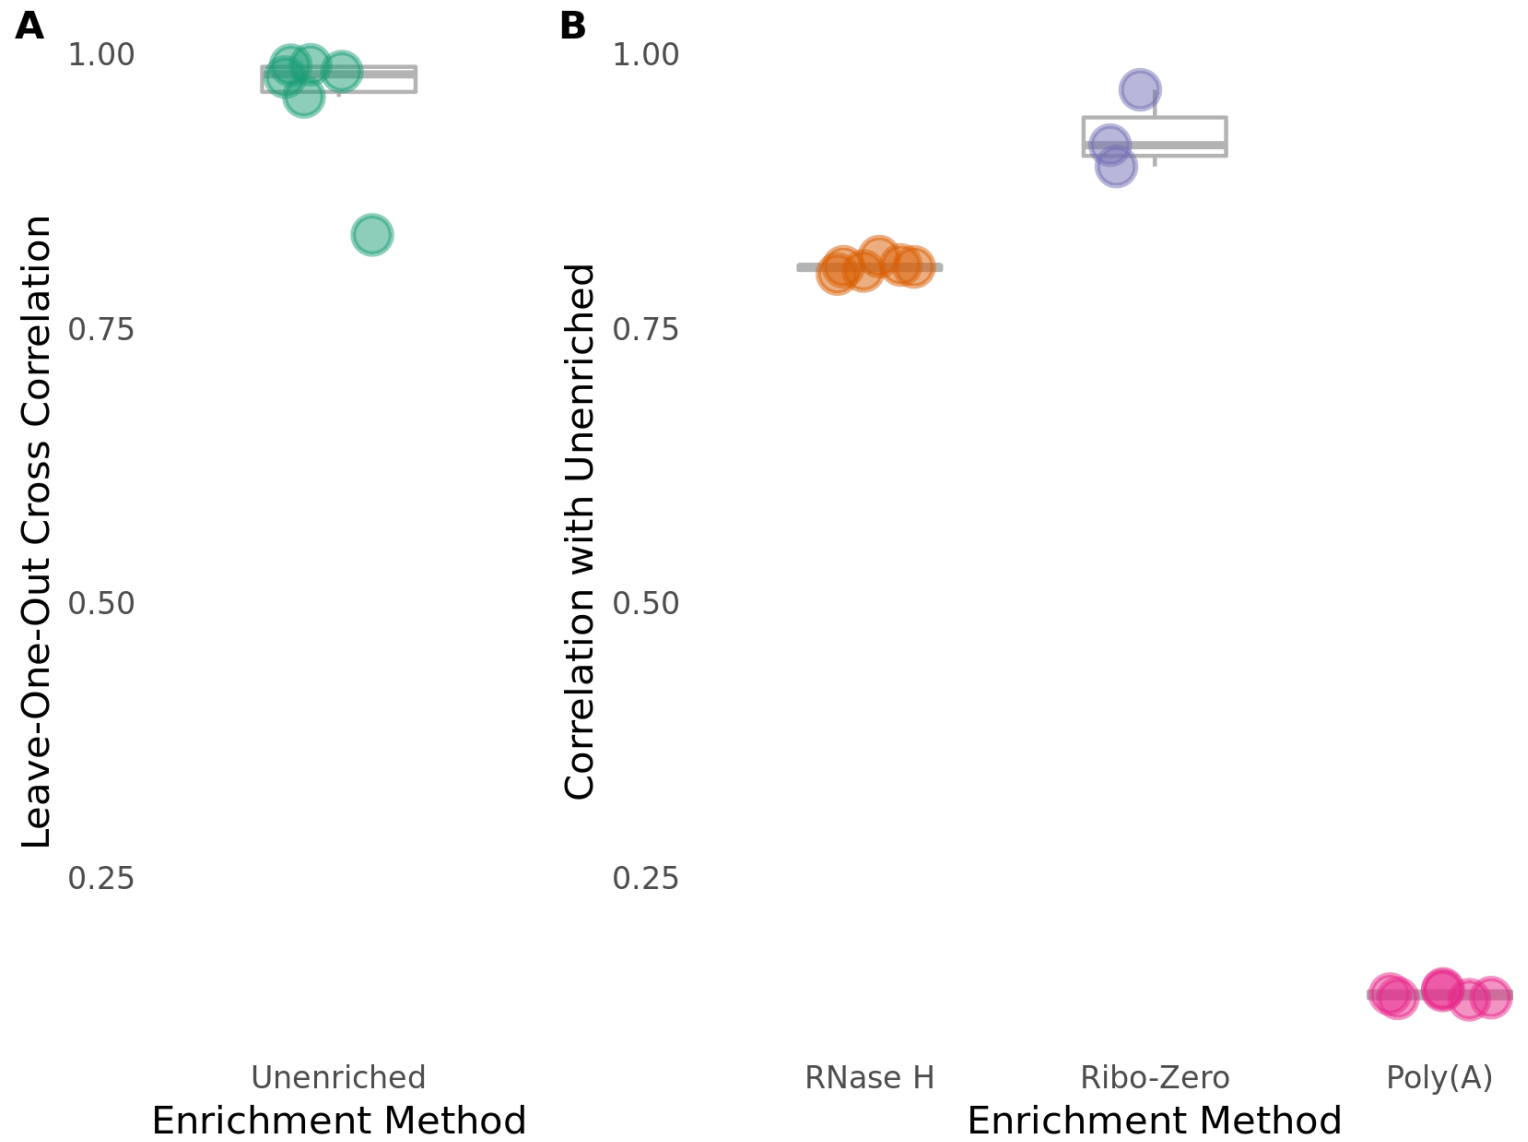

**Table 1. LncPipe identification of novel *C. neoformans* lncRNA:**

| Name              | Chromosome | Start   | End     | # Exons | Total Exonic Length | Mean TPM    | Median TPM |
|-------------------|------------|---------|---------|---------|---------------------|-------------|------------|
| LINC-CNAG_07358-1 | 1          | 996421  | 997387  | 2       | 863                 | 6.689427833 | 6.2667     |
| LINC-CNAG_07633-1 | 6          | 499352  | 499840  | 3       | 350                 | 2.844233167 | 0          |
| LINC-CNAG_07649-1 | 6          | 1351673 | 1352718 | 3       | 913                 | 5.5161474   | 5.799715   |
| LINC-CNAG_07769-5 | 9          | 828268  | 829327  | 3       | 919                 | 9.2005976   | 10.76355   |
| LINC-CNAG_07769-4 | 9          | 831951  | 833064  | 4       | 2019                | 5.333811583 | 5.026716   |
| LINC-CNAG_07769-1 | 9          | 838389  | 840007  | 10      | 2730                | 4.443440783 | 3.846055   |
| LINC-CNAG_04857-1 | 10         | 199988  | 203380  | 43      | 6849                | 12.5665295  | 12.729905  |
| LINC-CNAG_04857-2 | 10         | 203693  | 205767  | 2       | 1983                | 1.903616517 | 1.67792    |
| LINC-CNAG_01945-1 | 11         | 1333989 | 1334590 | 2       | 540                 | 3.47618165  | 1.745465   |
| LINC-CNAG_06521-2 | 13         | 743402  | 744570  | 4       | 1003                | 5.924291983 | 5.627535   |
| LINC-CNAG_07042-1 | 13         | 750280  | 751009  | 3       | 609                 | 5.950332833 | 4.02392    |

**Table 1. LncPipe identification of novel *C. neoformans* lncRNA:** Putative lncRNAs were discovered by analysis of RNase H-treated, Ribo-Zero-treated, and Unenriched RNA libraries. The name (assigned by LncPipe), chromosomal location, exon number, exonic length, and transcripts per million (TPM) across samples are shown for all 11 novel lncRNA identified.
